# Supplementary material
Source: Springer Nature journal article supplement (https://www.springermedizin.de/resource/supplementary/40164_2013_65_MOESM15_ESM.pdf/9687108)

# ABCA8

## Boston Cohort

(n=199)

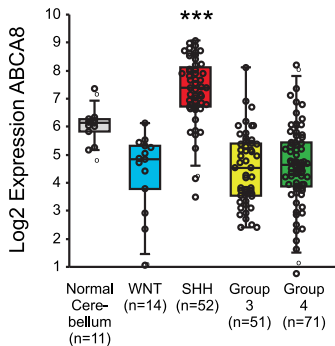

## Toronto Cohort

(n=103)

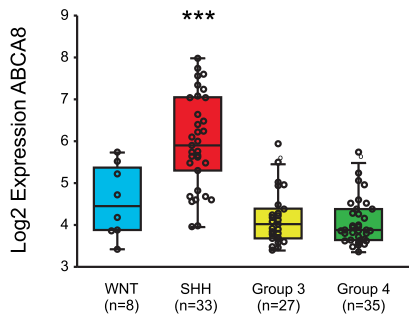

## Heidelberg Cohort

(n=64)

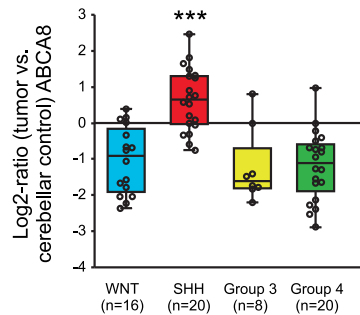

# ABCB4

## Boston Cohort

(n=199)

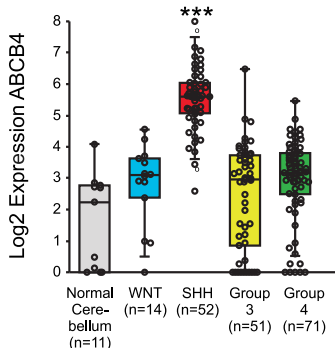

## Toronto Cohort

(n=103)

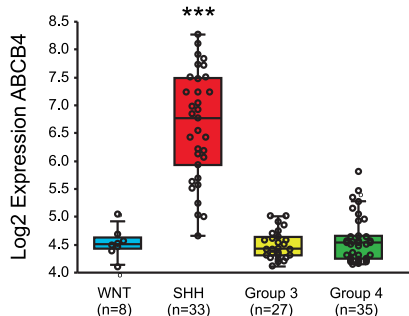

[gene not present in Heidelberg dataset]

# ABCC8

## Boston Cohort

(n=199)

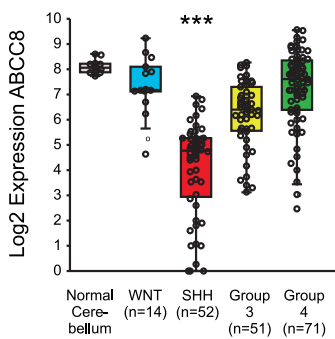

## Toronto Cohort #

(n=103)

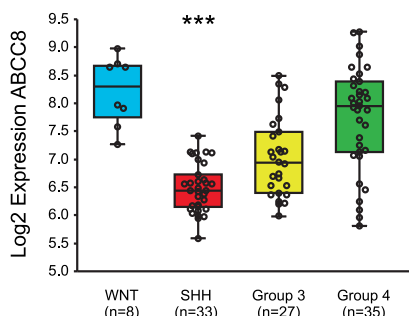

## Heidelberg Cohort

(n=64)

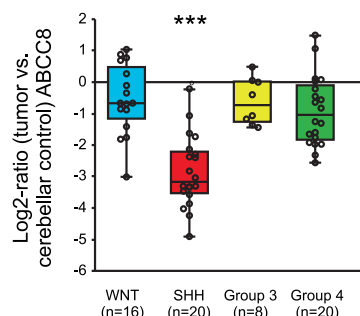

Supplement: MOESM15 [file 9687108]
